# Supplementary material for: Improving clinical outcomes of Barrett’s esophagus with high dose proton pump inhibitors and cryoablation
Source: Ann Med. 2023 May 26;55(1):1256–64. doi: 10.1080/07853890.2023.2191002 (PMC10228298; doi:10.1080/07853890.2023.2191002)
Supplement: Supplemental Material [file IANN_A_2191002_SM1341.xls]

## Sheet: Sheet1
	Initial Dx	1 st CRYO - Intial	cryo time to	last endo fu time after 1st CE-ablated.	other clin DATA		RECUR	PPI use		RECUR	ppi 2-BID,	G-paresis	hh	dys	age >59	race	sex
CRYO ID #Cryo PragueCM	EA= adenoCa. Idys=Indef dysplasia	hiatal hernia size	CE/ ablate	THEN if recur after 2nd ablate						IM-1 C-IM-2	1-QD 0-no	1=yes	signif	1= yes	1= yes	0- other	0 = male
												0= no	1= yes
pt #1 CRYO 12 C10M12	EAfocal,Idys,HGD,LGD	2008-01-11 hh2cm	23 mo	25 mo then refused	TIA on Ticlid changed to xeralto 2016. Crohns. Died from CVA 09-18-2018.	PET+ at gej, but was Mult myeloma Spine 2012	none	BID		0	2	0	0	1	1	1	1
pt #2 CRYO 8 C6M8	IM HGD nodule,LGD	2008-01-11 hh4cm	15 mo	106 mo	ON ASA 81 hold x 1 d chronic cough resolved post cryo 6 H/O GEJ ulcer		none	BID		0	2	0	1	1	1	1	0
pt #-3 CRYO 4 C3M5	HGD-Idys-LGD	2008-03-07 hh 3cm	4 mo	63 mo then refused	No ASA etc		none	BID		0	2	0	1	1	1	0	1
pt #-4 CRYO 3- C0M2	LGD multi focal	2009-02-27 hh 2cm	3 mo	84 mo	Plavix ASA 325mg		none	PPI +pepcid		0	1	0	0	1	1	1	0
pt #-5 CRYO 6 +2 C3M6	LGD	2009-2/27 hh 5cm	13 mo	Recur#1 @ 85mo then 6 mo for cryo x 2. Then 5 mo to neg endo Reablate; then ok at 29 mo.	No ASA etc. GERD resolved post cryo 6.		RECUR-1 in large HH short IM on U-turn ablate cryo x 2	PRN recur		1	0	0	1	1	1	0	1
pt #-6 CRYO 1 C0M2	IM	2009-09-20 hh 1cm	x 1	80 mo	No ASA etc		none	Nex qHS		0	1	0	0	0	0	1	1
pt #-7 CRYO 8 3 + 5. C4M6	LGD	2009-06-12 hh 3cm	14 mo to ablate then Recur-2 @ 45 mo. 43 mo to reablate. Then OK after 48mo.	45 mo to RECUR#2. then OK at 2 mo post recur some APC. Then 37 mo break to reablate. OK 48mo mo post reablate	ON ASA BID 161mg held x 3 days		Recur-2 only WATS	PRN -> recur		1	0	0	1	1	1	1	0
pt #-8 CRYO 1 C1M2	IM	2009-8-17 hh 3cm	x 1 (once only) Break 42	59 mo	No ASA etc		none	PPI +zantac		0	1	0	1	0	0	1	0
pt #-9 CRYO 1 C0M1	IM	2009-09-16 hh 1cm	x 1	119 mo CARDIA Recur-10. then OK at 2 mo post APC ablat and restart PPI BID	No ASA etc	FOCAL APC.	RECUR-10-C	BID -> PRN recur-C 10		2	0	0	0	0	0	1	1
pt #-10 CRYO 1- C0M3	LGD / IDD	2009-09-18 hh 3cm	x 1 DIED mesenteric ischemia-perfs-cirrhosis 06-29-19 BE still going 05-15-2018	104 mo BE not ablated	No ASA etc		none	omep QD		*0	*1	0	*1	1	0	1	0
pt #-11 CRYO 3 C0M2	Idys	2010-03-15 hh 1-2cm	2 mo	80 mo extraCryo x1	started ASA 81 mg 10/2017. Was No ASA etc. HGD colonP, Prior EtOH, Panc fib		none	PRN		0	0	0	0	1	0	1	0
pt#12 CRYO 3 C2M3	Idys	2010/04/28 hh <1cm	5mo	60 mo recur#3. then OK at 25 mo post reablate	No ASA etc PBC sp Liver Trans SP EVS x 3	odynophagia x 4 days; Tylenol x 1	RECUR-3 resolved after cryo x1	PRN Recur		1	0	0	0	1	1	0	1
pt#13-CRYO 1 C0M2	IM	2010-06-09 hh 2cm	x 1	132 mo	No ASA etc papilloma pharynx		none	QD		0	1	0	0	0	0	1	0
pt#14 CRYO 5 C5M7	HGD	2010/09/24 hh 4cm	9 mo	16 mo IM not ablated on daily PPI-occ-BID	MV & AVR on coumadin		refused fu CRYO	PRN		*0	*0	0	*1	1	1	0	0
pt#15 CRYO 3 C1M3	IntraMuc-EA & HGD	2011-01-25 hh 1 cm	2 mo extra cryo at 45 mo Break 42	18 mo	Plavix hold x 3 d. Morbid obese		none	QD + pepcid		0	1	0	0	1	0	1	0
pt#16 CRYO 3 + 1 then EMR & APC C1M2	LGD	2014-09-26 hh 2cm -> 4cm	5mo	Recur-#4 at cardia / GEJ @ 37 mo & Polyp in HH below Z-line -> cryo x 1 PATH EAC Tm1 in Lam Propria to Musc Muc -> ablated again then OK at 48 mo after 3 mo to reablate.	No ASA etc until shunt 07-2019 -> Motrin PRN for brain edema.	FOCAL APC 2017-12-20 after EMR 12/01/2017 for polyp with Ca	RECUR-4 hgd C-Ca	PRN RECUR hgd		1	0	0	1	1	1	1	1
pt#17 CRYO 2 C2M3	IM ->Idys/LGD. H/O EA spCRT	2014/10/24 hh 2cm	3 mo	22 mo	No ASA etc obese H/O EA met to liver SP CRT and liver RFA		none	QD-H2bib		0	1	0	0	1	1	1	1
pt#18 CRYO 3 C1M2	Idys	2014-12-05 hh 1 cm	4 mo	36 mo	No ASA etc		none	Dex QD		0	2	0	0	1	0	1	0
pt#19- CRYO 10 -> C11M16	LGD multi focal	2014-12-19 hh 4cm	DIED prob aspiration. IM still going; no dys	37 mo IM not ablated. dys ablated	No ASA etc COPD. Gastroparesis xs vomiting	sent for Nissen never saw surgeon	none	Nex BID Cara TID Pepcid qHS Reglan TID		*0	*2	1	*1	1	1	1	1
pt#20- CRYO 3 C1M2 APC Touch up	IM	2015-02-06 hh 6cm -> 3cm HT -> 6cm HS	11 mo	37 mo Recur-5 but resolved but only focal IM WATS at 34 mo resolved on restart PPI. APC given. Then OK 15 mo post reablate.	No ASA etc	APC Touch up	RECUR-5	QD Recur 5		1	1	0	1	0	0	0	0
pt#22- CRYO 2 C0M1	IM	5/4/2015 hh 1cm	2 mo	41 mo recur cardia 6-C then ok at 27 mo	No ASA etc	FOCAL APC.	RECUR-6-C	PRN recur-C6		2	0	0	0	0	1	0	0
pt#23 CRYO 3 C2M4	IM	2015/9/11 hh 2cm	4 mo	22 mo extraCryo	On ASA 81 mg since 2015	HIV	none	omep BID		0	2	0	0	0	0	1	0
pt#24- CRYO 1 C1M1	IM	2015/9/11 hh 2cm	x 1	48 mo	No ASA		none	PRN abt TIW		0	0	0	0	0	0	0	0
pt#25- CRYO 2 C2M5	LGD	12/11/2015 hh 1cm	2 mo	64 mo	ON ASA 81 hold x 1 d	Bronchospasm Rx post CRYO # 2 Rx OK	none got AIG	QD		0	1	0	0	1	0	0	0
pt#26 CRYO 1 C<1M1	IM	2016-03-09 hh <1 cm	x 1	68 mo	No ASA etc obese -mild pyloric stenosis S/P small pyloric ulcer	na	none	PRN		0	0	0	0	0	0	1	1
pt#27 CRYO 1 C<1M1	IM	2017-08-04 hh 3 cm	x 1	25mo	No ASA etc	na	none	DEX QD cara qHS <--Nex BID		0	2	0	1	0	0	0	1
pt#28 CRYO 5 C4M5 APC Touch up	LGD - Idys	2016-05-06 hh 3 cm	12 mo	13mo	ON ASA 81 hold x3-5 d. NONE x >1yr restarted x 6 mo		none	Dexilant qd & Cara qHS		0	2	0	1	1	1	1	1
pt#29 CRYO 2 C1M2 APC Touch up	IM	2016-06-03 hh 2cm	2 mo	18 mo	ON ASA 81 no IM 2011 endo	chest pain x 1-2 days as skipped PPI	none	Aciph BID		0	2	0	0	0	0	0	0
pt#31 CRYO 3 C0M1	Idys	2016-06-30 hh 4cm	10 mo	8 mo*=<1yr	No ASA etc since 01/2016; was ON ASA 81 HER chronic HB/pain resolved x 7 days post CRYO #1	Nissen 2016-11-04 chronic HB/pain resolved x 7 days post CRYO #1	none	DEX qd		0	2	0	1	1	0	1	1
pt#32 CRYO 3 C0M1	IM	2016-07-01 hh 1cm	10 mo	59mo	No ASA etc		none	BID		0	2	0	0	0	1	0	1
pt#33 CRYO 2 C0M1	IM	2016-07-01 hh 2cm	2 mo	26 mo	No ASA etc		none	PRN		0	0	0	0	0	0	1	0
p#34 CRYO 1 C1M1	IM	2016-08-04 no hh	x 1 IM still going 03-08-2019 DONE in CONN	33mo IM Still - IM not ablated as only PPI PRN	No ASA etc		none	PRN usually		*0	*0	0	0	0	1	1	1
pt#35 CRYO 2 C1M2	IM	2016-08-05 hh 1cm	5 mo	62 mo	No ASA etc		none	QD cara qHS		0	1	0	0	0	1	0	0
pt#36 CRYO 13 C11M16	HGD-IntraMucEA-Idys	2016-08-05 hh 3cm	16 mo IM resolved; only spots gastric ectopic mucosa ablated with extra CRYO x5 over 24 mo	62 mo.	No ASA etc		none	BID	gastric ectopic mucosa ablated	0	2	0	1	1	1	0	0
pt#37 CRYO 1 C1M2	IM	2016-08-04 hh 1cm	x 1	25 mo	No ASA etc		none	DEX qd Pep hs		0	2	0	0	0	0	1	1
pt#38 CRYO 2 C1M2	IM	2016-10-07 hh 1cm	2 mo	57 mo	ASA & Effient 2017<-No ASA		none	BID		0	2	0	0	0	0	0	0
pt#39 CRYO 1 C0M1	IM	2016-10-07 hh 1cm	x 1	65 mo	No ASA etc	reflux resolved post cryo	none	PRN		0	0	0	0	0	1	0	1
pt#40 CRYO 1 C0M2	IM	2016-10-07 hh 1cm	x 1	62 mo	Effient hold x 3 d. Bariatric surg	FOCAL APC. Had G-bypass	none	QD -Dex-pepcid		0	1	0	0	0	1	0	1
pt#41 CRYO 1 C0M1	IM	2016-11-04 hh 1cm	x 1	20 mo	No ASA etc		none	BID		0	2	0	0	0	1	0	1
pt#42 CRYO 3 C1M2	IM	2016-11-04 hh 1cm	5 mo	33 mo.	No ASA etc	2018 endo FOCAL APC --> slight odynophagia x 3 days; slight throat pain; temp 100 2 days in PM only; took tylenol.	none	BID		0	2	0	0	0	1	0	0
pt#43 CRYO 3 C1M3	LGD WATS. "XS" IM on path	2016-12-01 hh 4 cm	7 mo	58 mo	No ASA etc	FOCAL APC. 6/10 chest pain x 3 days; temp 1 day; took tylenol. Probable URI as cough precryo; took Augmentin. Only 2/10 chest disc post CRYO#2. FOCAL APC.	none	BID	gastric ectopic mucosa ablated	0	2	0	1	1	0	1	0
pt#44 CRYO 7 C10M11 APC & BICAP Touch up	LGD	2016-12-02 hh 3 cm	12 mo. Spots gastric ectopic mucosa ablated with CRYO x1 and apc	38 mo extra Bx & APC & BICAP	ON ASA 325 qd. Hold x 3-7 d. Since at least 2000 followed at MSK q1yr IM, Q6mo with LGD since at least 9/2003	FOCAL APC. Increased blood at cryo as took 325 ASA 2 days pre cryo. None preCRYO #2 x 5 days and only minimal bld	none	BID	gastric ectopic mucosa ablated	0	2	0	1	1	1	1	1
pt#45 CRYO 2 C1M1	IM	2016-12-02 hh - none	X1 extra CRYO AIG	58 mo	No ASA. Was ON ASA etc off it and off Eloquis since 09/15/2017. 2022-08-08 gastroparesis noted	FOCAL APC. Some gastroparesis 10/20/2016	AIG poss MILD g-PAR	QD -DEX	gastric ectopic mucosa ablated	0	2	1	0	0	1	1	0
pt#46 CRYO -2 C0M1	IM	2017-01-06 hh 2cm	2 mo	16 mo	No ASA etc		none	NEX BID		0	2	0	0	0	1	1	0
pt#47 CRYO -2 C1M2	IM	2017-02-03 hh 2cm	4 mo	61 mo	No ASA etc	FOCAL APC.	none	Omep BID		0	2	0	0	0	0	1	0
pt#48 CRYO -2 C1M3	IM	2017-02-03 hh 3cm	2 mo	25mo	No ASA etc	reflux resolved post cryo	none	DEX Cara		0	2	0	1	0	0	1	1
pt#49 CRYO -1+1 C0M1	IM	2017-02-03 hh 1cm	7 mo with Bx x 1+1	49 mo CARDIA Recur-7 ok at 3 mo	No ASA etc got cirrhosis LF-> Liver Trans 11-01-2018. cannot take it took carafate only x 7-8 days		RECUR-7-C	PRN - recur-C 7		2	0	0	0	0	0	1	0
pt#50 CRYO -1 C1M1	IM	2017-02-03 hh 2cm	x 1	52mo	No ASA etc obese; H/O ulcer at GEJ that healed on inc PPI	FOCAL APC. Slight odynophagia x 6 days; Tylenol x 1 only	none	QD		0	2	0	0	0	0	0	1
PT#51 CRYO - 1 C0M1	IM	2017-03-03 hh 2cm	x 1	29mo	ASA <-- No ASA etc	FOCAL APC.	none	QD		0	1	0	0	0	1	1	1
pt#52 CRYO -1 C0M1	IM	2017-03-03 hh none	x 1	58mo	No ASA etc		none	QD		0	2	0	0	0	0	0	1
pt#53 CRYO -1 C1M2	IM	2017-04-07 Hh 2cm	x 1	17 mo	No ASA etc	FOCAL APC.	none	BID		0	2	0	0	0	1	0	0
pt#54 CRYO -2 C0M2	IM	2017-04-07 HH none to 1cm sliding	7mo. Then Recur-8 #c cardia to Z-line @ 13 mo post cryo#2 or 19 mo post cryo #1 as path neg post #2 cryo. Then ok after reABLATE at in 2018 to 2021-09-16 to 35mo.	13 mo CARDIA Recur-8. Then ok at 35 mo	No ASA etc	FOCAL APC. gastroparesis-some- antrum OK. CT on 05-08 thick LES No LNs	RECUR-8-C some GASTROPARESIS	omep & DEX Cara -> add reglan recur-C 8		2	2	1	0	0	1	1	1
pt#56 CRYO -1 C1M2	IM H/O resect EA	2017-04-28 Hh 2cm	x 1	14 mo. RECUR Cardia #9. Then ok at 33 mo after reablate.	No ASA etc Some gastroparesis 07/5/2018 H/O resected EA 2001	FOCAL APC. Gastroparesis	RECUR-9-C 07/05/18 some GASTROPARESIS	Omep BID Cara qAM recur-C 9		2	2	1	0	0	1	1	1
pt#57 CRYO -2 C0M1	IM	2017-04-28 Hh 1-2cm	x 1 & at 5 mo extraCryo	48 mo PATH neg.	No ASA etc	Slight HB x 1-2d after cryo1.	none	omep + Dex ->omep BID		0	2	0	0	0	0	1	1
pt#58 CRYO -2 C1M3	IM	2017-04-28 Hh 1cm	3 mo	14mo extraCryo	No ASA etc	APC Touch up.	none	Omep BID & Cara BID		0	2	0	0	0	1	1	1
pt#59 CRYO -2 C0M1	IM	2017-06-02 Small hh with 5cm gastric pouch s/p lab band	5 mo	57mo	No ASA etc LAP BAND Some gastroparesis food twice, but no real peristalsis	pain x 3 after 1st cryo. LAP BAND -> chronic carditis. APC Touch up.	none	Back to omep, Dex Caraf Qhs<-DEX <-omep		0	2	1	0	0	0	1	1
pt#60 CRYO -2 C0M1	HGD-IntraMuc EA	2017-06-02 hh 1cm	3 mo	33mo	ON ASA 81 hold x2-5d COPD, A Fib H/O lap band 2007 deflated		none	NEX BID Famot qHS alt with Cara		0	2	0	0	1	1	0	0
pt#61 CRYO -2 C0M1	IM	2017-07-06 hh 1cm	x 1	2 mo =<1yr	No ASA etc		none	BID		0	2	0	0	0	0	0	0
pt#62 CRYO -2 C1M1+	IM	2017-08-04 hh 1cm	x 1	44mo extraCryo	No ASA etc		none	Dex & others Nex Zegerid powder PRN & Carafate PRN.		0	2	0	0	0	0	1	0
pt#63 CRYO -2 C1M2 APC Touch up	Idys	2017-08-04 hh 2cm	2 mo	47mo	No ASA etc		none	omep BID		0	2	0	0	1	1	0	1
pt#64 CRYO -2 C3M4 APC Touch up	IM	2017-09-01 hh 2cm	x1 extraCryo	13 mo	No ASA etc	slight dysphagia x 4 days. FOCAL APC	none	Protonix BID		0	2	0	0	0	0	1	0
pt#65 CRYO -1 C0M1 APC Touch up	IM	2017-09-01 small hh <1cm	x 1	12 mo	No ASA etc	APC focal..	none	OMEP BID <- omep & DEX		0	2	0	0	0	1	1	0
